# Supplementary material for: Microelectromechanical system for in situ quantitative testing of tension–compression asymmetry in nanostructures
Source: Royal Society of Chemistry journal article supplement (doi:10.1039/d3nh00407d), 2023-11-21
Supplement: d3nh00407d1.pdf [file d3nh00407d1.pdf]

## Supporting Information

### **Microelectromechanical system for in-situ quantitative testing of tension-compression asymmetry in nanostructures**

Yuheng Huang<sup>#</sup>, Kuibo Yin<sup>#\*</sup>, Binghui Li, Anqi Zheng, Bozhi Wu, Litao Sun, and Meng Nie<sup>\*</sup>

SEU-FEI Nano-Pico Center, Key Laboratory of MEMS of Ministry of Education, Southeast University, Nanjing 210096, China.

<sup>#</sup> Equally contributed.

[\*]E-mail: yinkuibo@seu.edu.cn, m\_nie@seu.edu.cn

## MEMS-based mechanical testing system

The details of the developed MEMS-based mechanical testing system are shown in Figure S1, which can be divided into three modules: MCU, ADC and MEMS development board. Compared to the previously designed integrated test boards [1], this modularized scheme and commercial MCU modules are compatible with different types of MEMS devices, resulting in a significant increase in experimental efficiency and fault tolerance.

When the system is operating, the control signals of the MCU are input to the corresponding ports of the ADC and MS3110 chips through the line to configure the operating modes. The wire-bonded MEMS device and MS3110 chip are integrated into a MEMS development board to reduce the ambient noise. The MS3110 chip is used to convert capacitance changes from differential capacitance sensor into analog voltages. The analog output voltage is collected and converted into a digital signal through the ADC module and transmitted to the PC in real-time through the serial port of the MCU. Through the conversion formula, the voltage change can be converted into the displacement change of the sensor, and the mechanical properties of the nanostructure can be further obtained.

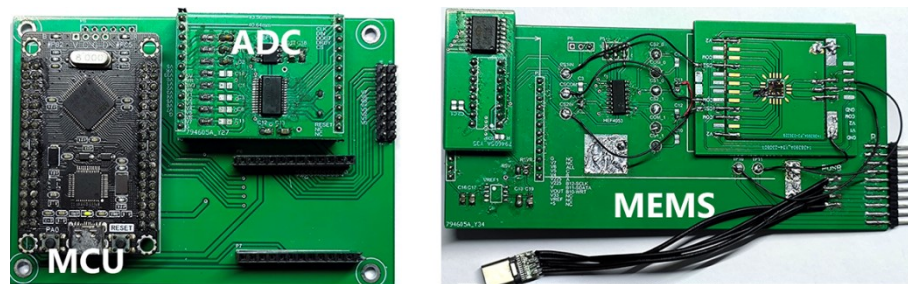

Fig.S1 The components of the MEMS-based *in-situ* quantitative mechanical test system.

## REFERENCES:

1. Y. Huang, M. Nie, B. Li, B. Wu, A. Zheng, K. Yin and L. Sun, *IEEE Sensors Journal*, 2023, **23**, 22592-22599.
